# Supplementary material for: Porous Stainless Steel Microsphere Synthesis by a Nonconventional Powder Metallurgy Process Useful in the Cermet-Type Advanced Nuclear Fuel Fabrication
Source: Hindawi journal article supplement (doi:10.1155/2023/3555763), 2023-04-29
Supplement: f1 [file 3555763.f1.docx]

**Supplementary Material**

*Research Article*

**Porous stainless steel microsphere synthesis by** **a non-conventional powder metallurgy process useful in the cermet**−**type advanced nuclear fuel fabrication**

**Luciana Sampaio Ribeiroa, Francisco Javier Riosa, Armindo Santosa**

a Centro de Desenvolvimento da Tecnologia Nuclear, CDTN, 31270-901 Belo Horizonte, MG, Brasil.

Correspondence should be addressed to A. Santos; [santosa@cdtn.br](mailto:santosa@cdtn.br)

**Supplementary Information**

**1. Tables**

Table SM1: Carbon black content (CBC) and drying parameters of the hydrogel microspheres.

| Hydrogel codes | CBC (g) | Drying parameters* | | | | Xerogel codes |
| --- | --- | --- | --- | --- | --- | --- |
| T(K) | Atm. | DT(h) | CM |
| SSM0h | 0.0 | 303 | Air | 24 | glass | SSM0x |
| SSM1h | 1.5 | 303 | Air | 24 | glass | SSM1x |
| SSM3h | 3.0 | 303 | Air | 24 | glass | SSM3x |
| SSM4h | 4.5 | 303 | Air | 24 | glass | SSM4x |
| SSM4+h | 4.5 | 303 | Air | 24 | glass | SSM4+x |
| UOM0h | 0.0 | 303 + 373 | Air | 24 + 2 | glass | UOM0x |

* T(K) = Temperature; Atm. = Atmosphere; DT(h) = Dwell time; and CM = Crucible material.

Table SM2: Sintering (si) and/or calcination (c) and/or reduction (r) sequential thermal treatment (STT) parameters (T(K)/Atm./DT(h)/HR(K/min)/CM)* of the xerogel microspheres.

| Sintering (si) | | Calcination (c) | | Reduction (r) | |
| --- | --- | --- | --- | --- | --- |
| Codes | STT | Codes | STT | Codes | STT |
| -  -  SSM1si  SSM3si  SSM4si  SSM4si  SSM4si  SSM4+si  UOM0si | -  -  1273/Ar/2/6.2/Mo  1273/Ar/2/6.2/Mo  1273/Ar/2/6.2/Mo  1273/Ar/2/6.2/Mo  1273/Ar/2/6.2/Mo  1273/Ar/2/6.2/Mo  1913/H2/2/1.8/Pt | -  -  SSM1c3  SSM3c3  SSM4c1  SSM4c2  SSM4c3  SSM4+c3  - | -  -  1173/Air/3/2.3/Pt  1173/Air/3/2.3/Pt  873/Air/3/2.3/Pt  873/Air/24/2.3/Pt  1173/Air/3/2.3/Pt  1173/Air/3/2.3/Pt  - | SSM0r1  SSM0r2  SSM1c3r  SSM3c3r  SSM4c1r  SSM4c2r  SSM4c3r  SSM4+c3r  - | 1273/H2/2/11.7/Mo  1523/H2/2/9.7/Mo  1073/ H2/2/6.2/Mo  1073/ H2/2/6.2/Mo  1073/ H2/2/6.2/Mo  1073/ H2/2/6.2/Mo  1073/ H2/2/6.2/Mo  1073/ H2/2/6.2/Mo  - |

* T(K) = Temperature; Atm. = Atmosphere; DT(h) = Dwell time; HR(K/min) = Heat rate; and CM = Crucible material.

Table SM3:SS−UO2 and SS pellet pressing parameters.

| Codes | Pressing parameters | | | |
| --- | --- | --- | --- | --- |
| Composition | Volumetric fraction (vol%SS−vol%UO2) | Mass (g) | Compaction pressure (MPa) |
| PCERM1 | UOM0si + SSM0r1 | 58−42 | 2.0 | 980.7 |
| PCERM2 | UOM0si + SSM4c1r | 58−42 | 2.0 | 588.4 |
| PCERM3 | UOM0si + SSM4c2r | 58−42 | 2.0 | 588.4 |
| PCERM4 | UOM0si + SSM4c3r | 58−42 | 2.0 | 588.4 |
| PCERM5 | UOM0si + SSM4c3r | 58−42 | 2.0 | 588.4 |
| PSS1 | SSM4+c3r | 100 | 2.0 | 588.4 |

Table SM4: Sequential thermal treatment (STT) parameters of the SS−UO2 cermet and SS pellets.

| Codes | STT parameters (T(K)/DT(h), HR(K/min), Atm., and CM)* | | | |
| --- | --- | --- | --- | --- |
| T(K)/DT | HR (K/min) | Atm. | CM |
| PCERM1 | 298−573/0.08, 573−873/0.08, 873−1073/0.08, 1073−1273/0.08, and 1273−1623/2.0 | 9.5 | H2 | Mo |
| PCERM2 | 298−573/0.08, 573−873/0.08, 873−1073/0.08, 1073−1273/2.0, 1273−1523/0.08, and 1523−1703/2.0 | 9.5 | H2 | Mo |
| PCERM3 | 298−573/0.08, 573−873/0.08, 873−1073/0.08, 1073−1273/2.0, 1273−1523/0.08, and 1523−1703/2.0 | 9.5 | H2 | Mo |
| PCERM4 | 298−573/0.08, 573−873/0.08, 873−1073/0.08, 1073−1273/2.0, 1273−1523/0.08, and 1523−1703/2.0 | 9.5 | H2 | Mo |
| PCERM5 | 298−573/0.08, 573−873/0.08, 873−1073/0.08, 1073−1273/0.08, 1273−1523/2.0, 1523−1623/0.08, and 1623−1703/4.0 | 1.9 | H2 | Mo |
| PSS1 | 298−573/0.08, 573−873/0.08, 873−1073/0.08, 1073−1273/0.08, 1273−1523/2.0, 1523−1623/0.08, and 1623−1703/4.0 | 1.9 | H2 | Mo |

* T(K) = Temperature; DT(h) = Dwell time; HR(K/min) = Heat rate; Atm. = Atmosphere; and CM = Crucible material.

**2. Ni content adjustment experiment in SSM4h microspheres**

The SSM0x microsphere composition obtained using the strategies of excess Cr (smaller) and Ni (larger) in the composition of the initial colloidal dispersion (60% Fe−17% Cr−23% Ni) and hot aging (338 K; to degrade the complexes formed) partially solved the loss of these elements in the production of the SSM0h microsphere. The same effect was obtained with carbon black-enriched SSM1x, SSM3x, and SSM4x microspheres. The loss of these elements, more severe for Ni, was due to the formation of complexes of [Ni(NH3)6]2+ (soluble in ammonia medium; an intense blue solution) and [Cr(NH3)6]3+ (slightly soluble in ammoniacal medium; a violet or pink solution) in the precipitation medium (NH4OH).

An experiment carried out later on with a carbon black-enriched SSM4h microsphere sample showed that it was possible to correct the Ni content via the adsorption of this element onto the hydrogel microspheres, resulting in microspheres SSM4+x with a 304-type SS composition. The SSM4+x microspheres were used to obtain pellet SS, PSS1. The composition of this pellet was analyzed. A yet untested and possibly more elegant solution to minimize the said Ni loss problem can be to exchange the column ammonia solution (NH4OH) (Figure 1a) for a NaOH solution, which would enable the formation of Ni(OH)2 and Cr(OH)3.

Procedure for the adsorption of Ni onto SSM4h microspheres: 60 mL of a Ni solution (167.1 g Ni/L) were added to 50 g of SSM4h microspheres; the Ni Solution−Microspheres dispersion was submitted to stirring (100 rpm) at 303 K for 6 h. After the adsorption of Ni, the resulting SSM4+h microspheres were separated from the depleted Ni solution and treated thermally.

**3. Apparatus used in the production of SS and UO2 microspheres and the pressing
 and sintering of SS**−**UO2 cermet and SS pellets**

SS and UO2microspheres were produced in an apparatus called “Column for the precipitation of hydrogel microspheres”. This apparatus is made up of a double-wall stainless steel tank (1.0 L), pressurable with compressed air, where a dispersion containing metal oxide precursors is stored. This tank is coupled to a thermostatic bath (243 to 423 K), a microdroplet formation system (a conical dosing nozzle, a vibrating platform, a frequency meter, and a strobe light), and an NH3 gas injection system. The conical dosing nozzle and the vibrating platform are positioned above a precipitation column (2.0-L cylindrical glass column) connected to a plastic bottle (1.0 L). This column contains the chemical precipitation medium (NH4OH) where the sol−gel transformation into hydrogel microspheres is completed.

To produce green pellets, a double-acting hydraulic press was used (maximum 1177 MPa; compaction time adjustable between 1 and 99 s from CiolaⓉ, model AC−10 type). This press has a die (cylindrical; 11 mm diameter) and two stainless steel punches lubricated with 460-type LUBRAX turbine oil (supplied by Petrobras − Petróleo Brasileiro S.A.) that allows the compaction and controlled ejection of the green pellets.

Thermal treatments (drying, calcination, reduction, and sintering) of the microspheres and pellets were carried out in high-temperature ovens (303−1973 K; tubular or muffle) under a controlled atmosphere (for example, argon and hydrogen) or not.

**4. XRD analysis details**

*XRD analysis of SSM0 microspheres*

Figures 6a−d show the XRD analysis of SSM0x (Figure 6a), SSM0r1 (Figure 6b), SSM0r2 (Figure 6c), and an industrial 304-type stainless steel powder (Figure 6d). As shown in Figure 6a, SSM0x exhibits only one 2-line ferrihydrite phase, Fe5HO8.4H2O, with a hexagonal crystal structure, which was identified by two broad peaks at 2θ equal to 33.70° and 62.04°, corresponding to the (110) and (115) planes, respectively. In Figure 6b, we can see that SSM0r1 has a well crystallized phase, with peaks at 44.48º, 50.84º, and 64.48º, corresponding to the (111), (200), and (200) planes, respectively, well fit to the Fe−Cr−Ni alloy. The alloy peaks at 44.48º (110) and 64.48º (200) correspond to the martensite phase (α-Fe + cementite (Fe3C); body-centered cubic crystal structure); at 50.84º (200), this peak corresponds to the austenite phase (γ-Fe; face-centered cubic crystal structure). Still in this figure, the peaks at 33.57°, 36.01°, 40.94°, 50.20°, 54.63°, 63.54°, and 65.02° (respective crystal planes (104), (110), (113), (024), (116), (214), and (300)) and 33.46°, 36.11°, 41.40°, 50.22°, 54.63°, 63.44°, and 65.01° (respective crystal planes (104), (110), (113), (024), (116), (214), and (300)), represent the Fe2O3 and Cr2O3 oxide phases, respectively, both with rhombohedral crystal structure. At 1523 K (Figure 6c, SSM0r2), the oxide−metal conversion increased, but now only the Cr2O3 oxide phase remained (peak at ~65o), resulting in the Fe−Cr−Ni alloy having new characteristic diffraction peaks at ~44º, ~45º, ~51º, ~65º, and ~75º, which are representative of planes (110; γ phase), (110; α phase), (200; γ phase), (200; α phase), and (220; γ phase), respectively. These alpha (α) and gamma (γ) phases correspond to the martensite and austenite phase contents, respectively, present in the **SSMOr2 stainless steel microspheres.**

*XRD analysis of SSM4 microspheres*

Figures 7a−e show the XRD analysis of the SSM4 microspheres. Figure 7a shows the ferrihydrite phase in SSM4x, already described in Figure 6a. The SSM4c1 microsphere, Figure 7b, displays the Fe−Cr−Ni alloy, Cr2O3, and Fe2O3, the latter shown in Figure 6b, and the NiFe2O4 phases. The NiFe2O4 phase (the only phase that does not appear in SSM4c1r (Figure 7c)) presents peaks at 30.33°, 35.52°, and 37.10°, corresponding to the planes (220), (311), and (222), respectively, of its cubic crystal structure. Figures 7d,e show the XRD patterns of the crystalline phases present in microspheres SSM4c3 (Figure 7d) and SSM4c3r (Figure 7e). All crystalline phases identified in Figures 7d,e have already been described in Figures 6a−d and Figures 7b,c.

*XRD analysis of UOM0 microspheres*

Figures 7f,g show the XRD patterns of the crystalline phases present in microspheres UOM0x (Figure 7f) and UOM0si (Figure 7g). As shown in Figure 7f, UOM0x exhibits only the metaschoepite phase, UO3.1.5H2O, with an orthorhombic crystal structure, which was identified by peaks 11.87°, 23.82o, 25.39°, 27.97°, 31.48°, 34.96°, 39.30°, 44.38°, 46.00°, 51.72°, 53.44°, 55.57°, and 58.41°, corresponding to planes (002), (004), (400), (242), (115), (244), (610), (640), (642), (644), (193), (671), and (804), respectively. In UOM0si, Figure 7g, only the UO2 phase, a fluorite-type cubic crystal structure, is present, as shown by the peaks at 28.57o, 33.07º, 47.37º, 55.99º, 58.84º, 68.94º, 75.99º, and 78.44º, corresponding to planes (111), (200), (220), (311), (222), (400), (331), and (420), respectively.

**5. Attesting the technical feasibility of manufacturing SS**−**UO2 cermet
 microspheres**

The discussion of the SS−UO2cermet microsphere manufacturing method will be the object of our attention in the continuation of the research and development of a SS−UO2cermet fuel. For now, we only want to present the first SS−UO2cermet microspheres produced (Figures 12a,a1−a6) and proof of the concept of manufacturing cermet pellets from the mixture of the SS−UO2cermet microspheres with porous metal oxide microspheres.

Figure 12a shows the naked UO2 microspheres. Figure 12a1 shows the result of the deposition of the first 12 layers of Fe, Cr, and Ni oxides onto the UO2 microsphere surface. The magnification in Figure 12a2 highlights the topological arrangement of the Fe, Cr, and Ni oxide particles, irregularly covering the UO2 microsphere surface (Figure 12a1). In Figure 12a3, the elemental map shows blue regions, which represent the UO2 microsphere surface not properly covered. As shown in Figures 12a4−a6, it is possible to obtain uniform SS layers between UO2 microspheres thicker than 13.4 µm with more than 15 layers of Fe, Cr, and Ni oxides (Figure 12a4), which would be necessary to avoid structural damage to the metallic matrix during cermet fuel irradiation. Figure 12a5 shows magnification of microspheres in Figure 12a4. Figure 12a6 shows elemental map of the microsphere in Figure 12a5.
